# Supplementary material for: 2A self-cleaving peptide-based multi-gene expression system in the silkworm Bombyx mori
Source: PubMed Central journal article supplement (PMC4633692; doi:10.1038/srep16273), 2015-11-05
Supplement: srep16273-s1.pdf [file srep16273-s1.pdf]

# **2A self-cleaving peptide-based multi-gene expression system in the silkworm *Bombyx mori***

Yuancheng Wang<sup>1,2,+</sup>, Feng Wang<sup>1,2,+</sup>, Riyuan Wang<sup>1</sup>, Ping Zhao<sup>1,2</sup>, Qingyou Xia<sup>1,2,\*</sup>

<sup>1</sup> State key laboratory of silkworm genome biology, Southwest University, Chongqing, China

<sup>2</sup> College of biology and technology, Southwest University, Chongqing, China

<sup>+</sup> These authors contribute equally to this work

\* Corresponding author

E-mail: xiaqy@swu.edu.cn

**A**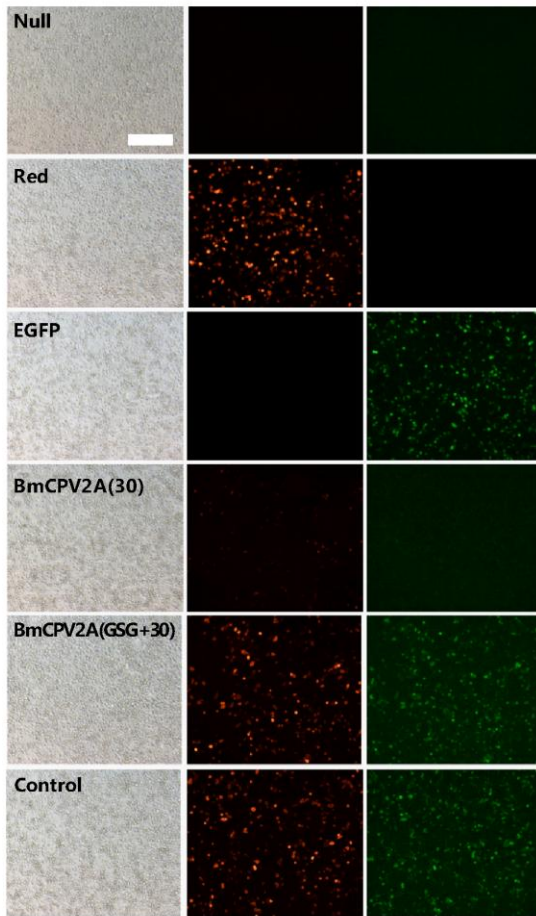**B**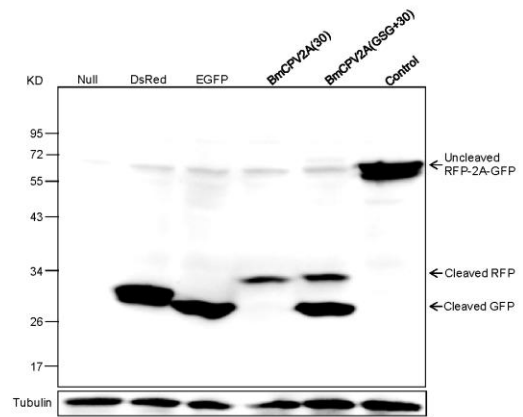**C**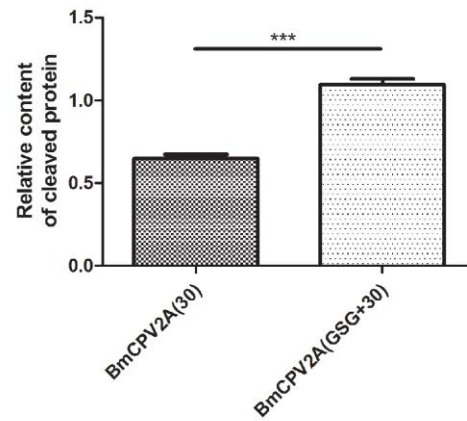

**Supplementary information, Figure S1.** GSG spacer improved the cleavage efficiency of 2A self-cleaving peptide in BmNS cell. (A) The results of fluorescent signal post-transfection in the BmNS cells. (B) Protein analysis of samples from the BmNS cells. (C) Cleavage efficiency analysis between BmCPV2A(30) and BmCPV2A(GSG+30) in the BmNS cells. Scale bar, 400um.

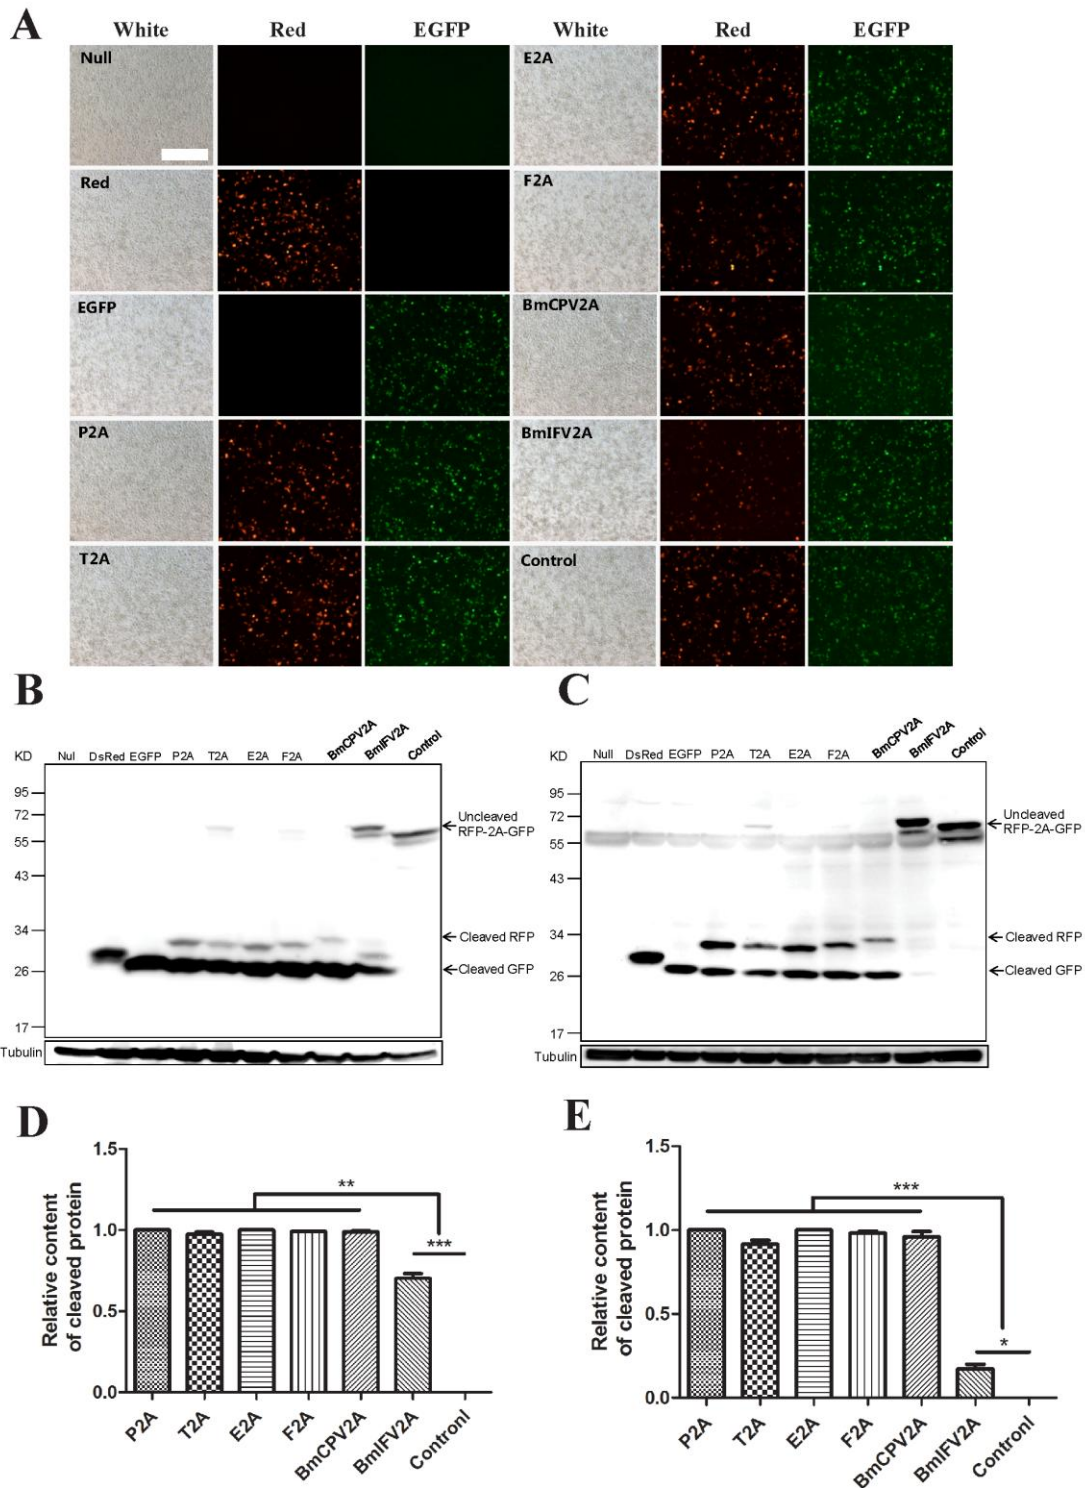

**Supplementary information, Figure S2.** P2A-GSG and E2A-GSG cleave DsRed-2A-EGFP fusion gene efficiently in the BmE, BmNS cells. (A) The results of fluorescent signal post-transfection in the BmNS cell. (B) and (C) Protein analysis of samples from the BmNS and BmE cells. (D) and (E) Cleavage efficiency analysis of six type 2A self-cleaving peptides in the BmNS and BmE cells. Scale bar, 400  $\mu$ m.

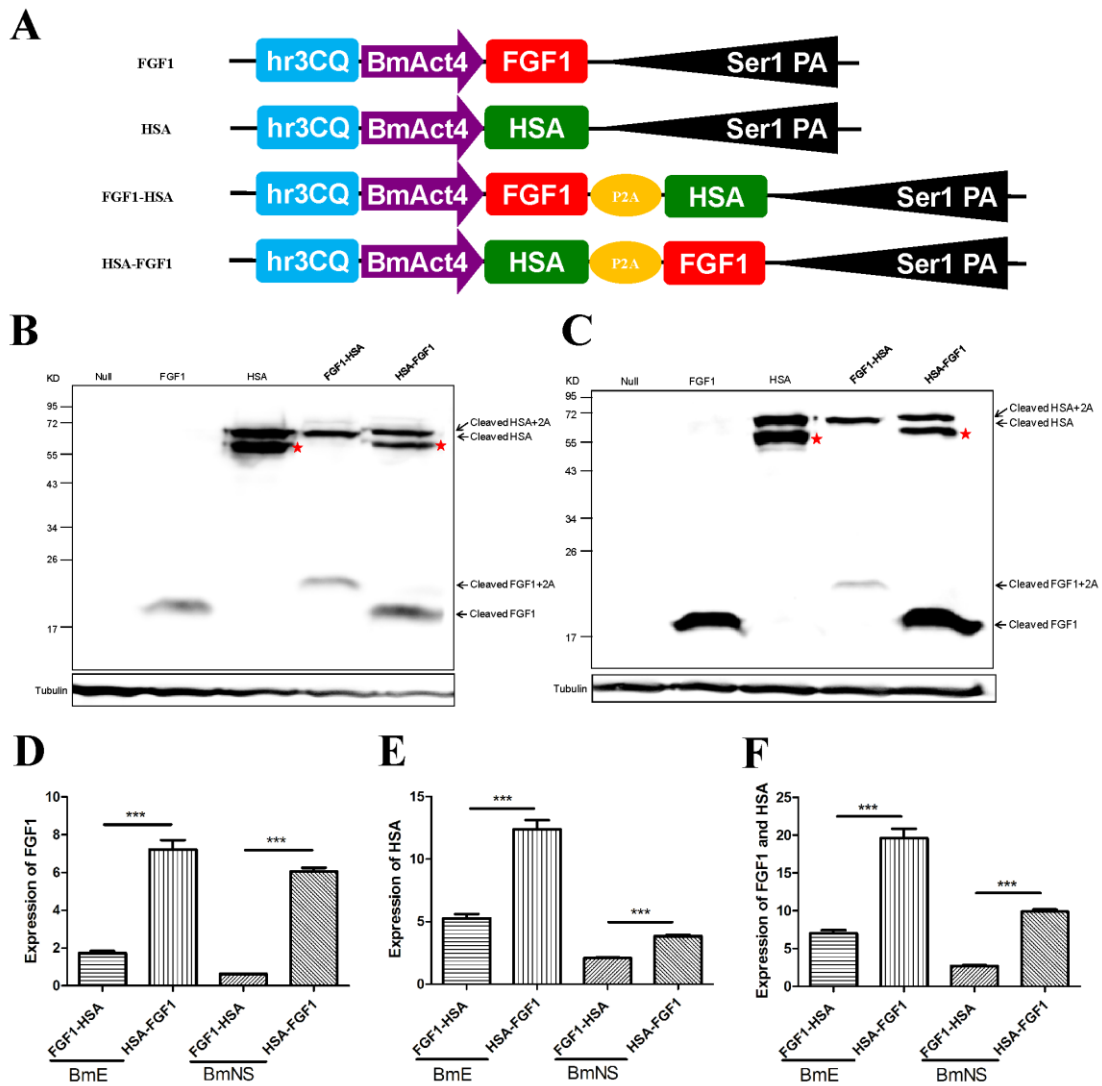

**Supplementary information, Figure S3.** P2A-GSG could cleave the artificial FGF1-2A-HSA and HSA-2A-FGF1 fusion genes. (A) Schematic diagram of the FGF1, HSA, FGF1-2A-HSA and HSA-2A-FGF1 expression vectors. GSG spacer was added at the N-terminus of P2A. (B) and (C) Protein analysis of samples from the BmE and BmNS cells. In western blotting, two mixed primary antibodies (anti-HSA antibody plus anti-FGF1 antibody) were used, and the second antibody was anti-rabbit IgG. The bands with asterisks indicated the degraded HSA or HSA-2A fusion proteins. (D), (E), (F) respectively indicated the comparison quantitatively of the expression of FGF1, HSA and FGF1 plus HSA in the BmE, BmNS cell.

**A**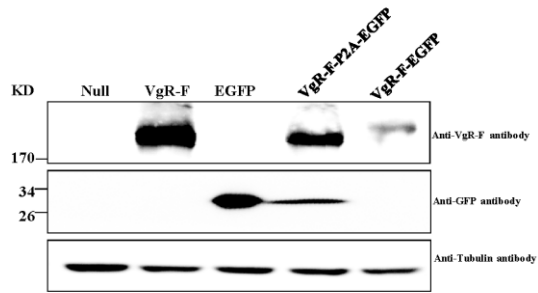**B**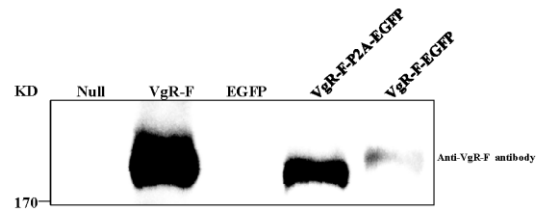

**Supplementary information, Figure S4.** P2A-GSG cleaved the VgR-F-P2A-EGFP fusion gene in the BmE cell.

(A) Protein analysis of samples from the BmE cells. (B) Protein analysis of samples from the culture medium of BmE cells.

**Supplementary information, Table S1.** Primers used in this study.

| Primer                                       | Sequence (5'-3')                                                                        |
|----------------------------------------------|-----------------------------------------------------------------------------------------|
| BamHI-DsRed Forward <sup>1,2,3,4,5,6,7</sup> | CTAGGGATCCATGGTGCCTCTCCAAGAA                                                            |
| EGFP-NotI Reverse <sup>1,2,3,4,5,6,7</sup>   | CTAGGCGGCCGCTTACTTGTACAGCTCGTCCATGCC                                                    |
| DsRed-P2A Reverse <sup>1</sup>               | AGGTCCAGGGTTCTCTCCACGTCTCCAGCTGCTTCAGCAGGCTGAAGTTAGTAGCTCCGCTTCCCAGGAACAGGTGG           |
| EGFP-P2A Forward <sup>1</sup>                | GGAAGCGGAGTACTAATTCAGCTGCTGAAGCAGGCTGGAGACGTGGAGGAGAACCCTGGACCTGTGAGCAAGGGCG            |
| DsRed-T2A Reverse <sup>2</sup>               | AGGTCCAGGATTCTCTCGACGTCAACCATGTTAGCAGACTTCTCTGCCCTCTCCGCTTCCCAGGAACAGGTGG               |
| EGFP-T2A Forward <sup>2</sup>                | GGAAGCGGAGAGGGCAGAGGAAGTCTGCTAACATGCGGTGACGTGAGGAGAATCCTGGACCTGTGAGCAAGGGCG             |
| DsRed-E2A Reverse <sup>3</sup>               | AGGTCCAGGGTTGCTCTCAACATCTCCAGCAATTTCAAGAGAGCATAATTAGTACACTGCTCCGCTTCCCAGGAACAGGTGG      |
| EGFP-E2A Forward <sup>3</sup>                | GGAAGCGGACAGTGTACTAATTATGCTCTTGAATTTGGCTGGAGATGTTGAGAGCAACCCTGGACCTGTGAGCAAGGGCG        |
| DsRed-F2A Reverse <sup>4</sup>               | AGGTCCAGGGTTGGACTCCACGTCTCCGCCAATGAGAAGGTCAAATTCAAAGTCTGTTCACTCCGCTTCCCAGGAACAGGTGG     |
| EGFP-F2A Forward <sup>4</sup>                | GGAAGCGGAGTGAAACAGACTTTGAATTTTACCTTCTCAAGTTGGCGGGAGACGTGGAGTCCAACCCTGGACCTGTGAGCAAGGGCG |
| DsRed-BmCPV2A Reverse <sup>5</sup>           | GCACAACCTTAGTAGGTCATAATTAGAGCGAAAAACGTCTGCTGAAATCGAACGCTGTTCTTCCGCTTCCCAGGAACAGGTGG     |
| EGFP-BmCPV2A Forward <sup>5</sup>            | CAGCAGGACGTTTTTCGCTCAATTATGACCTACTAAAGTTGTGCGGTGATATCGAGTCAATCCTGGACCTGTGAGCAAGGGCG     |
| DsRed-BmIFV2A Reverse <sup>6</sup>           | ACGAATCAATTCATCTCAATCTCCCTCGTCAGAGTCCGCGCACATTACCAATTGAGGGTCCGCTTCCCAGGAACAGGTGG        |
| EGFP-BmIFV2A Forward <sup>6</sup>            | GCGCGACTCTGACGAGGGCGAAGATTGAGGATGAATTGATTCGTGCAGGAATTGAATCAAATCCTGGACCTGTGAGCAAGGGCG    |
| DsRed-Control Reverse <sup>7</sup>           | ACGGCCATTAACTGTCACCACAAGTAGAACACGTCCACCGCCACCCAGGAACAGGTGG                              |
| EGFP-Control Forward <sup>7</sup>            | GGTGGCGGTGGACGTGGTTCTACTTGTGGTACGTTAATGGCCGTGTGAGCAAGGGCG                               |
| BamHI-FGF1 Forward <sup>8</sup>              | CTCTGAGGATCC ATGTTCAACTTACCTCCAGGCAA                                                    |
| NotI-FGF1 Reverse <sup>8</sup>               | ATGCTGAGCGGCCGCTTAGAGACCGAGTGTGCTTGA                                                    |
| FGF1-2A Reverse <sup>8</sup>                 | CCTCGACGTACCGCATGTTAGCAGACTTCTCTGCCCTCTCCGCTTCTCGCTTTGCTCGGTGAGATGATACGGGCAGC           |
| HSA-2A Forward <sup>8</sup>                  | AGCGGAGAGGGCAGAGGAAGTCTGCTAACATGCGGTGACGTGAGGAGAATCCTGGACCTGATGCTCATAAGTCGGAAGT         |

---

|                                      |                                                                                  |
|--------------------------------------|----------------------------------------------------------------------------------|
| BamHI-HSA Forward <sup>9</sup>       | CTCTGAGGATCCATGGATGCTCATAAGTCGGAAGT                                              |
| NotI-HSA Reverse <sup>9</sup>        | ATGCTGAGCGGCCGCTTAGTCAGATGATACGGGCAGC                                            |
| HSA-2A Reverse <sup>9</sup>          | CCTCGACGTCACCGCATGTTAGCAGACTTCTCTGCCCTCTCCGCTTCTCGCTTGCTCGGAGACCGAGTGCTGCTTGA    |
| FGF1-2A Forward <sup>9</sup>         | AGCGGAGAGGGCAGAGGAAGTCTGCTAACATGCGGTGACGTGCGAGGAGAATCCTGGACCTTCAACTTACCTCCAGGCAA |
| XhoI-P2A-EGFP-Forward <sup>10</sup>  | CTGACTCGAG CGCCACCACCTGTTCTCTG                                                   |
| XhoI -EGFP-Forward <sup>11</sup>     | CTGAGCGGCCGCTTACTTGACAGCTCGTCCATGCC                                              |
| NotI-P2A-EGFP-Reverse <sup>12</sup>  | CTGACTCGAGATGGTGAGCAAGGGCG                                                       |
| Realtime-DsRed-Forward <sup>13</sup> | CGCCACCATTGTTCTCTC                                                               |
| Realtime-EGFP-Reverse <sup>14</sup>  | TGAGGGCAGCCAAAGCAA                                                               |

---

<sup>1-7</sup> indicated the primers used to construct the fusion gene Red-P2A-EGFP, Red-T2A-EGFP, Red-E2A-EGFP, Red-F2A-EGFP, Red-BmCPV2A-EGFP and Red-BmIFV2A-EGFP, respectively. <sup>8-9</sup> indicated the primers used to construct fusion gene FGF1-P2A-HSA, HSA-P2A-FGF1, respectively. <sup>10-12</sup> indicated the primers used to construct fusion gene VgR-F-P2A-EGFP and VgR-F-P2A-EGFP. <sup>13-14</sup> indicated the primers used to detect the expression of fusion gene spDsRed-P2A-spEGFP in mRNA level by real time PCR .
